# Supplementary material for: Identification of a basement membrane gene signature for predicting prognosis and estimating the tumor immune microenvironment in prostate cancer
Source: publisher site journal article supplement (doi:10.18632/aging.205445), 2024-01-17
Supplement: Supplementary file [file aging-v16i2-205445-supplementary-material-SD1.pdf]

**SUPPLEMENTARY FIGURES**

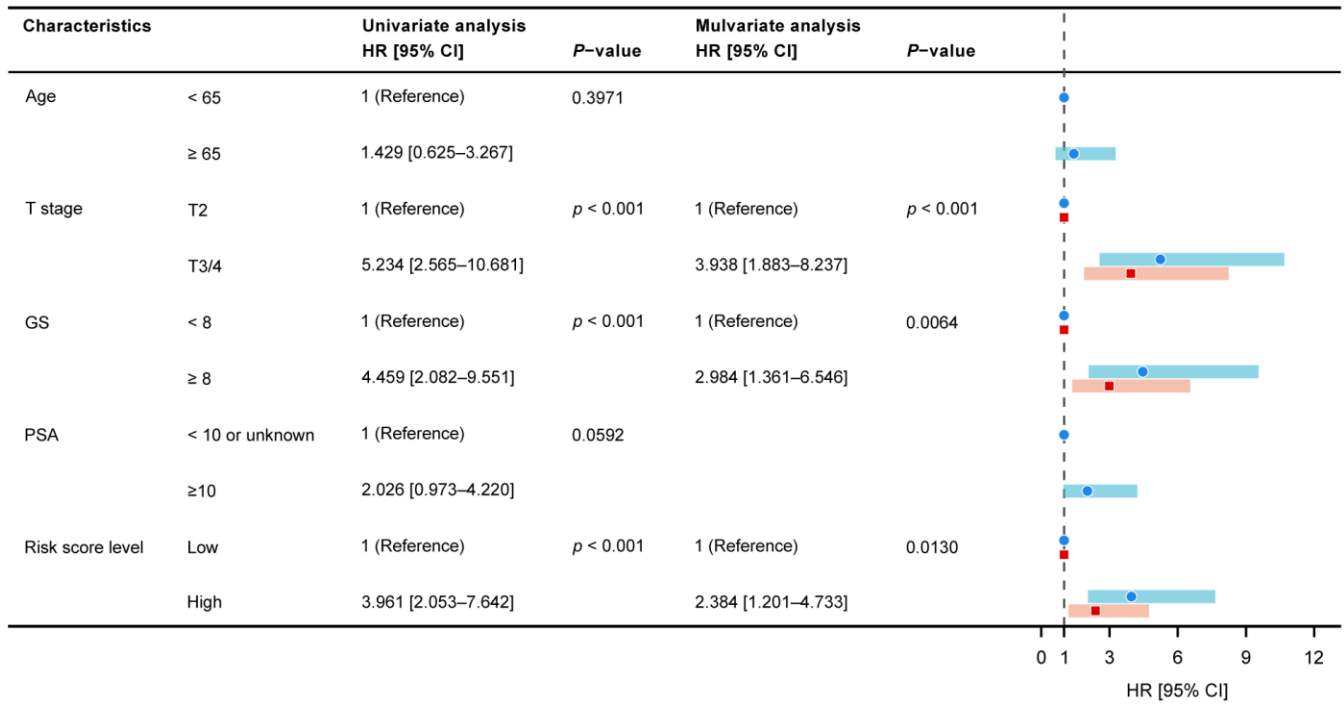

**Supplementary Figure 1. The forest maps show the results of univariate and multivariate Cox regression analyses in the MSKCC validation set.**

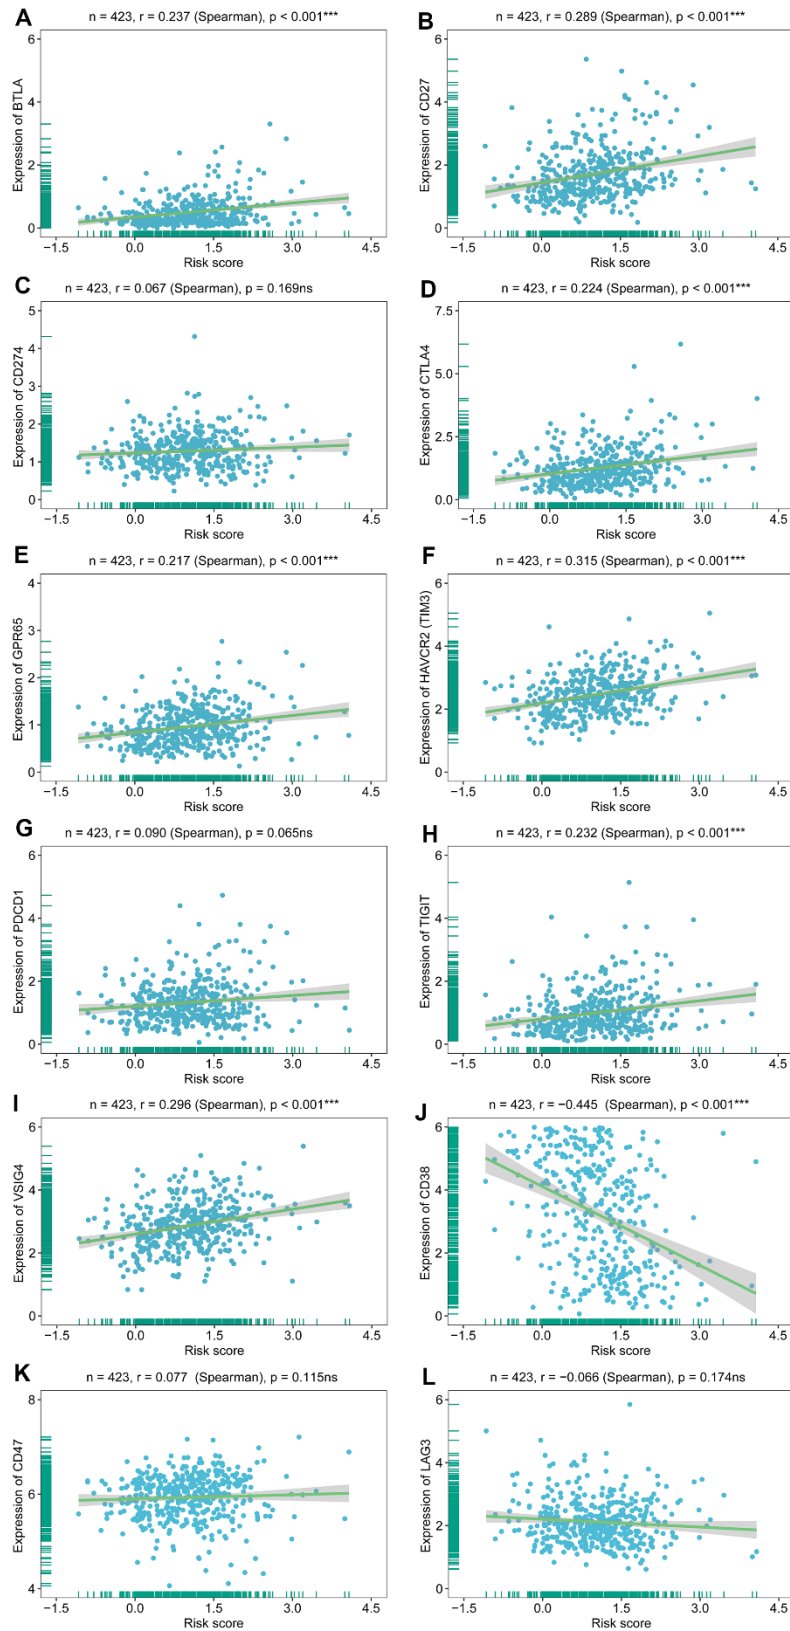

**Supplementary Figure 2. Correlation analysis between BMRS and immune checkpoints.** (A–L) The scatter plot results show statistically significant expression of most immune checkpoint genes in both risk groups. There was a significant positive correlation between BMRS and these seven immune checkpoints (BTLA, CD27, CTLA4, GPR65, HAVCR2, TIGIT and VSIG4) and a significant negative correlation with CD38. ns:  $p \geq 0.05$ , \* $p < 0.05$ , \*\* $p < 0.01$ , \*\*\* $p < 0.001$ .
