# Supplementary material for: Identification of a basement membrane gene signature for predicting prognosis and estimating the tumor immune microenvironment in prostate cancer
Source: publisher site journal article supplement (doi:10.18632/aging.205445), 2024-01-17
Supplement: Supplementary file [file aging-v16i2-205445-supplementary-material-SD2.pdf]

## SUPPLEMENTARY TABLES

**Supplementary Table 1. A list of 224 basement membrane genes.**

| Basement membrane genes (BMGs) |        |        |          |          |        |       |         |
|--------------------------------|--------|--------|----------|----------|--------|-------|---------|
| ACAN                           | COL5A1 | FREM1  | MMP2     | ACHE     | FBN3   | LOXL4 | ROBO1   |
| ADAM10                         | COL6A1 | FREM2  | MMP21    | ADAMTS1  | FMOD   | LUM   | SDC1    |
| ADAM17                         | COL6A2 | GPC3   | MPZL2    | ADAMTS14 | FREM3  | MATN1 | SDC4    |
| ADAM9                          | COL6A3 | GPC4   | MUSK     | ADAMTS15 | GPC1   | MATN2 | SEMA3B  |
| ADAMTS10                       | COL7A1 | GPC6   | NTN1     | ADAMTS16 | GPC2   | MATN4 | SLIT1   |
| ADAMTS13                       | COL8A2 | HMCN1  | P3H1     | ADAMTS19 | GPC5   | MEGF6 | SLIT2   |
| ADAMTS17                       | COL9A1 | HSPG2  | P3H2     | ADAMTS20 | HAPLN1 | MEGF9 | SLIT3   |
| ADAMTS18                       | COL9A2 | ITGA2B | PTPRF    | ADAMTS4  | HAPLN2 | MEP1A | SPARCL1 |
| ADAMTS2                        | COL9A3 | ITGA3  | PXDN     | ADAMTS5  | HMCN2  | MEP1B | SPOCK1  |
| ADAMTS3                        | COLQ   | ITGA6  | ROBO2    | ADAMTS6  | ISLR   | MMP17 | SPOCK2  |
| AGRN                           | CST3   | ITGA7  | ROBO3    | ADAMTS7  | ITGA1  | MMP26 | SPOCK3  |
| AMELX                          | CTSA   | ITGA8  | ROBO4    | ADAMTS8  | ITGA10 | MMP7  | SPON1   |
| AMTN                           | CTSB   | ITGB2  | RPSA     | ADAMTS9  | ITGA2  | MMRN2 | SPON2   |
| ANG                            | CTSD   | ITGB3  | SERPINF1 | BCAN     | ITGA4  | NELL1 | TENM1   |
| BGN                            | DAG1   | ITGB4  | SMC3     | CCDC80   | ITGA5  | NELL2 | TENM2   |
| CD151                          | DCC    | ITGB6  | SMOC1    | CD44     | ITGA9  | NID1  | THBS1   |
| CERT1                          | DCN    | LAMA1  | SMOC2    | COL14A1  | ITGAM  | NID2  | THBS2   |
| COL12A1                        | DDR2   | LAMA2  | SPARC    | COL15A1  | ITGAV  | NPNT  | THBS4   |
| COL13A1                        | ECM1   | LAMA3  | TENM3    | COL28A1  | ITGAX  | NTN4  | TIMP1   |
| COL17A1                        | EFEMP1 | LAMA4  | TENM4    | COL8A1   | ITGB1  | OGN   | TIMP2   |
| COL18A1                        | EFEMP2 | LAMB1  | TGFB1    | CSPG4    | ITGB5  | OPTC  | TINAG   |
| COL2A1                         | FBLN1  | LAMB2  | TGFB2    | DDR1     | ITGB7  | PAPLN | TINAGL1 |
| COL4A1                         | FBLN5  | LAMB3  | TGFBI    | EGFL6    | ITGB8  | PHF13 | UNC5A   |
| COL4A2                         | FBN1   | LAMC2  | TIMP3    | EGFLAM   | LAD1   | PODN  | UNC5B   |
| COL4A3                         | FBN2   | LAMC3  | TLL1     | EVA1A    | LAMA5  | POSTN | UNC5C   |
| COL4A4                         | FGF9   | LOXL1  | TNC      | EVA1B    | LAMB4  | PTN   | UNC5D   |
| COL4A5                         | FN1    | MMP1   | USH2A    | EVA1C    | LAMC1  | PXDNL | VTN     |
| COL4A6                         | FRAS1  | MMP14  | VCAN     | FBLN2    | LOXL2  | RECK  | VWA1    |

**Supplementary Table 2. The clinicopathological characteristics of patients in the TCGA-PRAD cohort and MSKCC cohort.**

| <b>Characteristics</b> | <b>TCGA-PRAD<br/>(n=423)</b> | <b>MSKCC<br/>(n=140)</b> |
|------------------------|------------------------------|--------------------------|
| Age(year)              |                              |                          |
| <65                    | 283                          | 117                      |
| ≥65                    | 140                          | 23                       |
| T stage                |                              |                          |
| T1/2                   | 154                          | 86                       |
| T3/4                   | 269                          | 54                       |
| Gleason score          |                              |                          |
| <8                     | 241                          | 127                      |
| ≥8                     | 182                          | 13                       |
| PSA (ng/mL)            |                              |                          |
| <10 or unknown         | 409                          | 116                      |
| ≥10                    | 14                           | 24                       |
| Recurrent events       | 52                           | 36                       |

**Supplementary Table 3. The siRNA oligos used for knock-down of THBS2.**

| <b>Name</b> | <b>Target sequence</b> | <b>Note</b>      |
|-------------|------------------------|------------------|
| si-THBS2#1  | GTGGCACATTCTACGTA AAA  | siRNA Knock-down |
| si-THBS2#2  | GGACCTATCTATGACCA AAA  | siRNA Knock-down |
| si-THBS2#3  | GGAACATTGGCTGGAAGGA    | siRNA Knock-down |
